# Supplementary material
Source: Springer Nature journal article supplement (https://www.springermedizin.de/resource/supplementary/12881_2011_825_MOESM8_ESM.pdf/9451504)

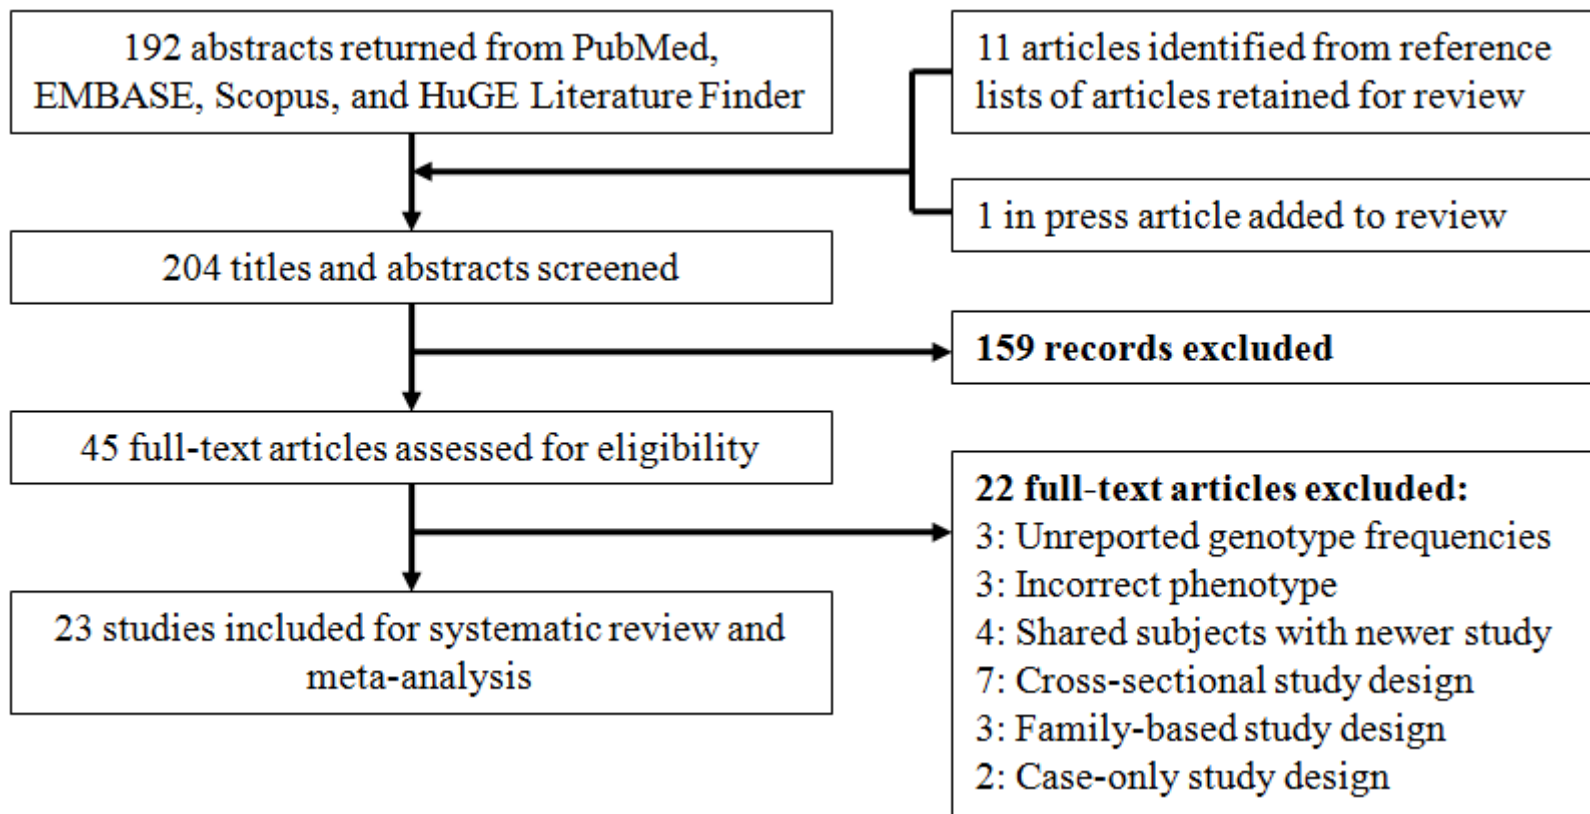

Supplement: MOESM8 [file 9451504]
